# Supplementary material
Source: PubMed Central journal article supplement (PMC4824634)
Supplement: NIHMS752758-supplement-Supplement.pdf [file NIHMS752758-supplement-Supplement.pdf]

**Immunity**

**Supplemental Information**

**Thinking Outside the Gate:**

**Single-Cell Assessments in Multiple Dimensions**

**Pia Kvistborg, Cécile Gouttefangeas, Nima Aghaeepour, Angelica Cazaly, Pratip K. Chattopadhyay, Cliburn Chan, Judith Eckl, Greg Finak, Sine Reker Hadrup, Holden T. Maecker, Dominik Maurer, Tim Mosmann, Peng Qiu, Richard H. Scheuermann, Marij J.P. Welters, Guido Ferrari, Ryan R. Brinkman, and Cedrik M. Britten**

## Supplemental Acknowledgements

This work was supported by a research grant from the Wallace Coulter Foundation (Florida, USA) to C.M.B., C.C., and C.G., the ISAC Scholars Program (N.A., P.C.), the CIHR/MSFHR scholarship for strategic training in bioinformatics (N.A.), UBC's 4YF scholarship (N.A.), NSERC (R.R.B.), US NIH EB008400 (R.R.B., G.F., R.H.S.), AI089859 (R.H.S.), and HHSN272201200005C (R.H.S.), and SFB685 Z5 (C.G.).

**Table S1. Freely Available Software for Computational Analysis of Flow/Mass Cytometry Data**

| Type/Name             | Use                                                                                                              | Reference                                                               | Technical Notes                                                                                                                                                               |
|-----------------------|------------------------------------------------------------------------------------------------------------------|-------------------------------------------------------------------------|-------------------------------------------------------------------------------------------------------------------------------------------------------------------------------|
| <b>Pre-processing</b> |                                                                                                                  |                                                                         |                                                                                                                                                                               |
| EMMIX-JCM             | Reduce batch data variability                                                                                    | PMID: 24983991                                                          | R package that uses joint clustering and matching to construct an overall batch template                                                                                      |
| FCSClean              | Identify outlier events (i.e. fluorescence vs. time)                                                             | <a href="http://www.genepattern.org/">http://www.genepattern.org/</a>   | R software that removes spurious events based on time vs. fluorescence                                                                                                        |
| FCSTrans              | Manipulate file formats                                                                                          | PMC3932304                                                              | R package for FCS to .txt conversion                                                                                                                                          |
| fdaNorm               | Adjust data to account for batch effects                                                                         | PMC3648208                                                              | R/Bioconductor software to adjust data to account for batch effects like laser drift                                                                                          |
| flowCore              | Read/write, process (transform, compensate) of flow data. The basic flow infrastructure.                         | PMC2684747                                                              | R/Bioconductor core infrastructure for representing cell populations and the parent/child relationships amongst them                                                          |
| flowQ                 | Identify outlier samples (e.g. wells drying out, reagent issues)                                                 | PMC2768034                                                              | R/Bioconductor package that provides infrastructure to generate interactive HTML quality reports                                                                              |
| flowStats             | Advanced statistical methods and functions, specialized and general gating algorithms                            | <a href="http://www.bioconductor.org/">http://www.bioconductor.org/</a> | R/Bioconductor software that collects several algorithms together for normalization and gating                                                                                |
| flowUtils             | Import gates, transformation and compensation                                                                    | <a href="http://www.bioconductor.org/">http://www.bioconductor.org/</a> | R/Bioconductor package to support Gating-ML specification to exchange gate coordinates between softwares                                                                      |
| flowWorkspace         | Import manually gated data from FlowJo workspaces, represent manual and automated gating hierarchies efficiently | PMC3992339                                                              | R/Bioconductor core infrastructure that makes manually gated data accessible to BioConductor's computational flow tools by importing pre-processed and gated data from FlowJo |
| guassNorm             | Adjust data to account for batch effects                                                                         | PMC3648208                                                              | R/Bioconductor software to adjust data to account for batch effects like laser drift                                                                                          |
| MIFlowCyt             | Checklist for describing flow cytometry experiments                                                              | PMC2773297                                                              | Minimum information guideline to aid description of experiments in manuscripts                                                                                                |
| ncdfFlow              | Advanced method for large dataset processing                                                                     | PMC3992339                                                              | R/Bioconductor package that overcomes memory limitations when working with large datasets by                                                                                  |

|                         |                                                                             |                                                                                                           |                                                                                                                                                                                            |
|-------------------------|-----------------------------------------------------------------------------|-----------------------------------------------------------------------------------------------------------|--------------------------------------------------------------------------------------------------------------------------------------------------------------------------------------------|
|                         |                                                                             |                                                                                                           | storing FCS data in netCDF files on disk                                                                                                                                                   |
| plateCore               | Analyze multiwell plates                                                    | PMC2777006                                                                                                | R/Bioconductor package that enable automated negative control-based gating and plate-based analysis                                                                                        |
| QUALIFIER               | Identify outlier samples                                                    | PMC3499158                                                                                                | R/Bioconductor software that uses manual gates to perform an extensive series of statistical quality assessment checks on gated cell sub-populations                                       |
| ReFlow                  | Manage and annotate single or multi-center FCS data                         | <a href="https://github.com/whitews/ReFlow">https://github.com/whitews/ReFlow</a><br>Submitted manuscript | FCS data management framework that provides a modern web interface for harmonizing FCS annotation especially across multiple laboratories                                                  |
| <b>Automated Gating</b> |                                                                             |                                                                                                           |                                                                                                                                                                                            |
| ACCENSE                 | Unsupervised cell population identification                                 | PMC3890841                                                                                                | R/Matlab software for dimensionality reduction with density-based partitioning                                                                                                             |
| ASPIRE                  | Unsupervised cell population identification                                 | PMID: 25248977                                                                                            | Matlab code that performs joint cell clustering and cluster matching in the presence of random effects                                                                                     |
| CCAST                   | Unsupervised cell population identification                                 | PMID: 25078380                                                                                            | R package that combines any clustering algorithm with silhouette measures followed by recursive partitioning to generate a decision tree based gating strategy                             |
| FindingPopulations      | Unsupervised cell population identification                                 | PMID: 25170025                                                                                            | R script for cell population identification using Fluorescence-Minus-One controls                                                                                                          |
| FLAME                   | Unsupervised cell population identification                                 | PMC2682540                                                                                                | Multivariate finite mixtures of skew & tailed distributions                                                                                                                                |
| FLOCK                   | Unsupervised cell population identification                                 | PMC3084630                                                                                                | Stand alone software for clustering using an adaptive multi-dimensional mesh to estimate local density followed by hierarchical merging of adjacent regions based on density differentials |
| flowCL                  | Annotate cell populations using formal ontologies                           | <a href="http://www.bioconductor.org/">http://www.bioconductor.org/</a><br>PMID: 25481008                 | R/Bioconductor software to label cell populations with semantic identifier from the Cell Ontology library                                                                                  |
| flowClust               | Unsupervised cell population identification                                 | PMC2701419                                                                                                | R/Bioconductor software for clustering using t-mixture model with Box-Cox transformation with support for Bayesian priors                                                                  |
| flowDensity             | Supervised cell population identification to automate manual gating process | PMID: 25378466                                                                                            | R/Bioconductor software for supervised gating to match manual analysis for clinical trials and diagnosis                                                                                   |
| flowFP                  | Unsupervised cell population identification                                 | PMC2777013                                                                                                | R/Bioconductor software for fingerprint generation via multivariate probability distribution                                                                                               |

|             |                                                                                                     |                                                                                                           |                                                                                                                                                                                          |
|-------------|-----------------------------------------------------------------------------------------------------|-----------------------------------------------------------------------------------------------------------|------------------------------------------------------------------------------------------------------------------------------------------------------------------------------------------|
| flowMatch   | Cell population matching                                                                            | PMC3471348                                                                                                | R/Bioconductor software to match clusters across samples for producing robust meta-clusters                                                                                              |
| FlowMap-FR  | Cell population matching                                                                            | <a href="https://github.com/JoyceHsiao/flowMap-release">https://github.com/JoyceHsiao/flowMap-release</a> | R/Bioconductor software to match cell population clusters across samples using the F-R statistic                                                                                         |
| flowMeans   | Unsupervised cell population identification                                                         | PMC21182178                                                                                               | R/Bioconductor software for k-means clustering and merging using the Mahalanobis distance                                                                                                |
| flowMerge   | Unsupervised cell population identification                                                         | PMC2798116                                                                                                | R/Bioconductor software that combines flowClust and entropy-based or mahalanobis distance-based cluster merging                                                                          |
| flowPeaks   | Unsupervised cell population identification                                                         | PMC3400953                                                                                                | R software for unsupervised clustering using k-means and mixture model                                                                                                                   |
| flowPhyto   | Unsupervised cell population identification for marine biology                                      | PMID: 21208987                                                                                            | R/Bioconductor software for analysis of marine biology data                                                                                                                              |
| flowQB      | Identify bead populations for instrument setup                                                      | <a href="http://www.bioconductor.org/">http://www.bioconductor.org/</a>                                   | R/Bioconductor software for analysis of detector efficiency and optical background for matching sensitivity analysis                                                                     |
| flowTrans   | Estimate parameters for data transformation                                                         | PMC3243046                                                                                                | R/Bioconductor infrastructure to optimize parameter choice for different transformations                                                                                                 |
| flowType    | Unsupervised cell population identification                                                         | PMC3998128                                                                                                | R/Bioconductor software for combinatorial gating of high-dimensional populations and correlative analysis against clinical outcomes                                                      |
| NetFCM      | Semi-automated web-based method for flow cytometry data analysis                                    | PMID: 25044796                                                                                            | Semi-automatic gating strategy that uses clustering and principal component analysis (PCA) together with other statistical methods to mimic manual gating approaches                     |
| NMF-curvHDR | Unsupervised cell population identification                                                         | PMC2832899                                                                                                | Density-based clustering and non-negative matrix factorization                                                                                                                           |
| OpenCyto    | General framework to construct reproducible automated gating pipelines and simplify data processing | <a href="http://opencyto.org/">http://opencyto.org/</a>                                                   | R/Bioconductor infrastructure for hierarchical automated gating that maintains relationships amongst cell populations                                                                    |
| py-fcm      | Flow cytometry data management and Bayesian event modeling                                          | PMID: 23874174                                                                                            | A collection of tools in Python for parsing and analysis of FCS files, with a focus on nonparametric Bayesian statistical mixture models for unsupervised cell population identification |
| SamSpectral | Supervised cell population identification                                                           | PMC2923634                                                                                                | R/Bioconductor software for efficient spectral clustering using density-based down-sampling                                                                                              |
| SPADE       | Unsupervised cell population identification                                                         | PMC3196363                                                                                                | Matlab/Standalone/R/Bioconductor tool for density-based sampling, k-means clustering and minimum                                                                                         |

|                        |                                                                                                     |                                                                               |                                                                                                                                                                                                   |
|------------------------|-----------------------------------------------------------------------------------------------------|-------------------------------------------------------------------------------|---------------------------------------------------------------------------------------------------------------------------------------------------------------------------------------------------|
|                        |                                                                                                     |                                                                               | spanning trees                                                                                                                                                                                    |
| SWIFT                  | Unsupervised gating for rare cell populations                                                       | PMID: 24677621                                                                | Iterative weighted sampling procedure with splitting and merging to retain discrimination of extremely small subpopulations                                                                       |
| X-cyt                  | Supervised cell population identification to automate manual gating process                         | PMC3839720                                                                    | R script that partitions each sample with initialization by user template, then optimizes on the parameters via estimation-maximization                                                           |
| <b>Data Analysis</b>   |                                                                                                     |                                                                               |                                                                                                                                                                                                   |
| BioConductor           | Open source software for bioinformatics                                                             | PMC545600                                                                     | Bioconductor provides tools for the analysis and comprehension of high-throughput genomic data. Bioconductor uses the R statistical programming language, and is open source and open development |
| Citrus                 | Identify most important cell populations correlated with outcome of interest                        | PMID: 24979804                                                                | Regularized supervised learning algorithms to identify stratifying clusters that are the best predictors of a known experimental endpoint of interest                                             |
| COMPASS                | Identify combinatorial subsets of polyfunctional T cells                                            | <a href="http://rglab.github.io/COMPASS/">http://rglab.github.io/COMPASS/</a> | R software that is multivariate extension of MIMOSA that jointly models all combinatorial polyfunctional cell subsets                                                                             |
| GenePattern            | Interface to multi-step analysis pipelines                                                          | PMC3717030                                                                    | Web interface and cloud computing interface for over 30 R/BioConductor packages                                                                                                                   |
| MIMOSA                 | Identify responders and non-responders to stimulation in intracellular cytokine staining assay data | PMC3862207                                                                    | R/Bioconductor software to detect antigen-specific changes in marginal or specific cell subsets                                                                                                   |
| <b>Post-processing</b> |                                                                                                     |                                                                               |                                                                                                                                                                                                   |
| CytoBank               | Share and analyze data associated with flow and mass cytometry experiments                          | PMID: 20578106                                                                | Cloud-based solution for organizing, analyzing and visualizing single-cell data                                                                                                                   |
| flowPlots              | Graphical displays with statistical tests for gated ICS flow cytometry data                         | <a href="http://www.bioconductor.org/">http://www.bioconductor.org/</a>       | R/Bioconductor software that provides analysis plots and data class for gated flow cytometry data                                                                                                 |
| flowViz                | Visualization (e.g. histograms, dot plots, density plots, gating hierarchies and layouts)           | PMC2768483                                                                    | R/Bioconductor software that employs Trellis graphics and can be adapted to provide useful visualizations                                                                                         |
| FlowRepository         | Share flow and mass cytometry data associated with peer-reviewed manuscripts,                       | PMID: 22887982                                                                | Open, public repository for flow cytometry data including FCS files and experiment settings                                                                                                       |

|             |                                                                              |                |                                                                                                                                                                     |
|-------------|------------------------------------------------------------------------------|----------------|---------------------------------------------------------------------------------------------------------------------------------------------------------------------|
|             | annotated according to MIFlowCyt                                             |                |                                                                                                                                                                     |
| flowSOM     | Enables the visualization of complex flow data                               | PMID: 25573116 | R/Bioconductor software that uses Self-Organizing Maps                                                                                                              |
| gEM/GANN    | Extract feature sets from datasets                                           | PMID: 25572884 | Combines of WEKA and C++ feature selections program using Genetic Algorithm-Neural Network                                                                          |
| ImmPort     | Share and analyze genomic, proteomic and other data                          | PMID: 24791905 | Production, analysis, archiving, and exchange of scientific data for the diverse community of life science researchers. Supported by NIAID/DAIT                     |
| RchyOptimyx | Identify most important cell populations correlated with outcome of interest | PMC3998128     | R/Bioconductor software that optimizes cellular hierarchies to preserve correlation with external variables and summarize large datasets in simple plots            |
| viSNE       | Visualize high-dimensional data                                              | PMC4076922     | Matlab software that uses Stochastic Neighbor Embedding for visualizing high-dimensional data by giving each datapoint a location in a two or three-dimensional map |

Published tools are classified in four categories, namely pre-processing, automated gating, data analysis, and post-processing.
